# Supplementary material for: Pharmacological and genetic reappraisals of protease and oxidative stress pathways in a mouse model of obstructive lung diseases
Source: PubMed Central journal article supplement (PMC5159865; doi:10.1038/srep39305), 2016-12-16
Supplement: srep39305-s1.pdf [file srep39305-s1.pdf]

Supplementary information

**Pharmacological and genetic reappraisals of protease and oxidative stress pathways in a mouse model of obstructive lung diseases**

Tsuyoshi Shuto<sup>1,\*</sup>, Shunsuke Kamei<sup>1,2</sup>, Hirofumi Nohara<sup>1,2</sup>, Haruka Fujikawa<sup>1,2</sup>, Yukihiro Tasaki<sup>1</sup>, Takuya Sugahara<sup>1</sup>, Tomomi Ono<sup>1</sup>, Chizuru Matsumoto<sup>1</sup>, Yuki Sakaguchi<sup>1</sup>, Kasumi Maruta<sup>1</sup>, Ryunosuke Nakashima<sup>1</sup>, Taisei Kawakami<sup>1</sup>, Mary Ann Suico<sup>1</sup>, Yoshitaka Kondo<sup>3</sup>, Akihito Ishigami<sup>3</sup>, Toru Takeo<sup>4</sup>, Ken-ichiro Tanaka<sup>5</sup>, Hiroshi Watanabe<sup>6</sup>, Naomi Nakagata<sup>4</sup>, Kohei Uchimura<sup>7</sup>, Kenichiro Kitamura<sup>7</sup>, Jian-Dong Li<sup>8</sup> and Hirofumi Kai<sup>1,\*</sup>

<sup>1</sup>Department of Molecular Medicine, Graduate School of Pharmaceutical Sciences. <sup>2</sup>Program for Leading Graduate Schools “HIGO (Health life science: Interdisciplinary and Global Oriented) Program”, Kumamoto University, 5-1 Oe-Honmachi, Chuo-ku, Kumamoto 862-0973, Japan. <sup>3</sup>Molecular Regulation of Aging, Tokyo Metropolitan Institute of Gerontology, 35-2 Sakae-cho, Itabashi-ku, Tokyo 173-0015, Japan. <sup>4</sup>Division of Reproductive Engineering, Center for Animal Resources and Development (CARD), Kumamoto University, 2-2-1 Honjo, Chuo-ku, Kumamoto, 860-0811, Japan. <sup>5</sup>Laboratory of Bio-Analytical Chemistry, Research Institute of Pharmaceutical Sciences, Musashino University, Nishitokyo-shi, Tokyo 202-8585, Japan. <sup>6</sup>Department of Biopharmaceutics, Graduate School of Pharmaceutical Sciences, Kumamoto University, 5-1 Oe-honmachi, Chuo-ku, Kumamoto 862-0973, Japan. <sup>7</sup>University of Yamanashi School of Medicine, 1110 Shimokato, Chuo, Yamanashi 409-3898, Japan. <sup>8</sup>Center for Inflammation, Immunity & Infection, Institute for Biomedical Sciences, Georgia State University, 714 Petit Science Center, 100 Piedmont Ave SE, Atlanta, GA30303, USA.

Fig. S1

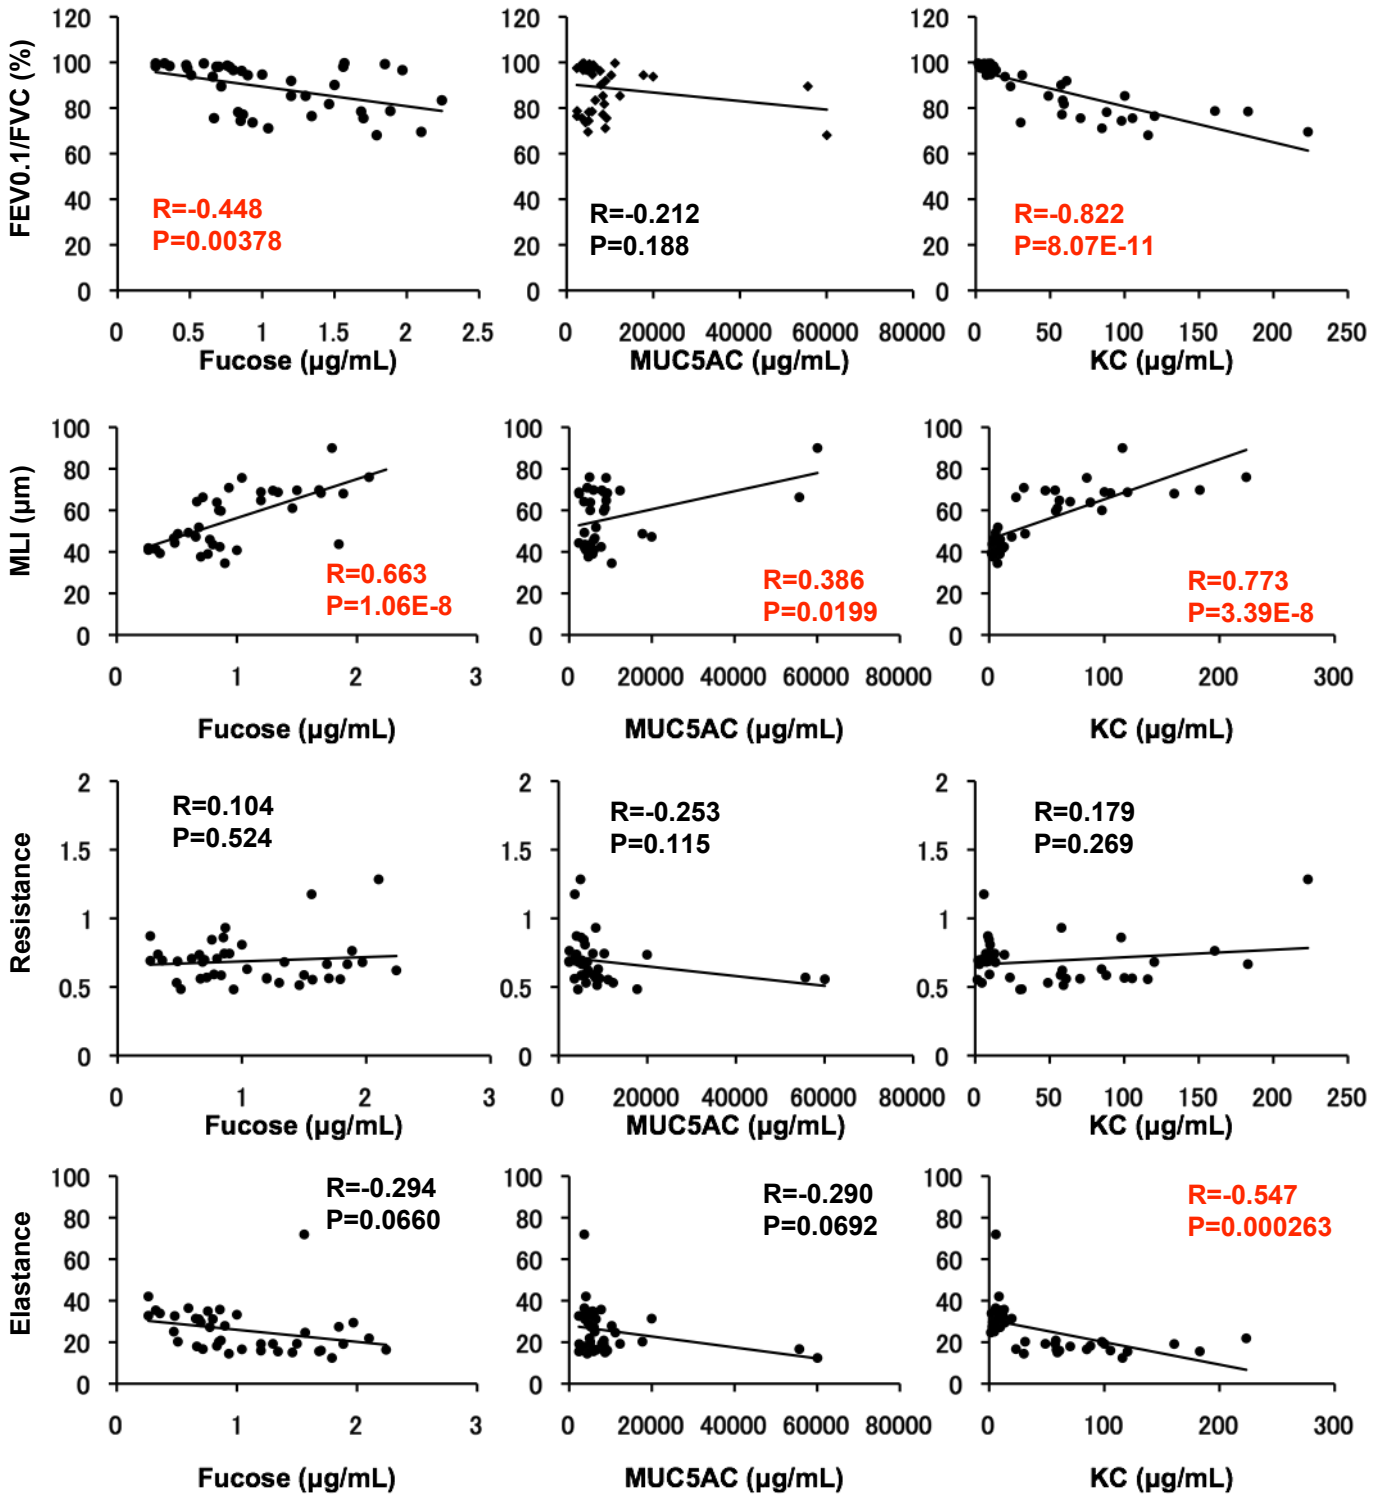

**Fig. S1. Correlation analysis of parameters.** Analysis between pulmonary parameters and biochemical parameters in BALF in WT and C57/BL6J- $\beta\text{ENaC-Tg}$  mice ( $n=36-41$ ) and correlation scatter plots were shown.

Fig. S2

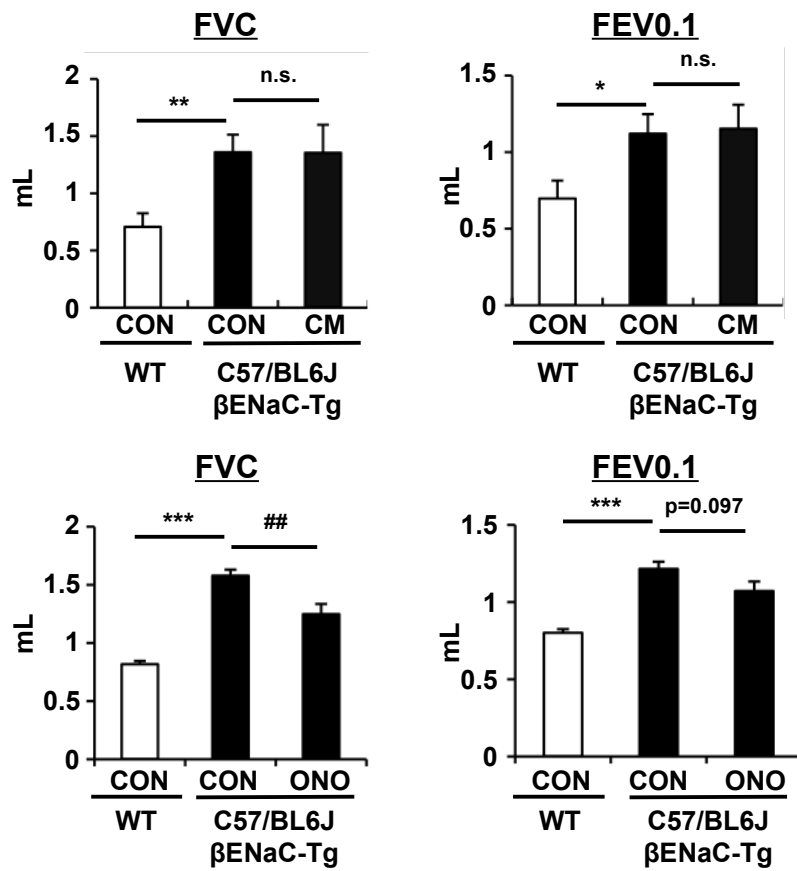

**Fig. S2. Effect of protease inhibitors on FVC and FEV0.1 in C57/BL6J-βENaC-Tg mice.** Pulmonary phenotypes (FVC and FEV0.1) were evaluated in oral camostat methylate (CM)- or ONO3403-treated C57/BL6J-βENaC-Tg mice. Age-matched C57/BL6J mice (WT) were used as healthy controls. n=4-7 and n=7-8 for CM and ONO3403 treatments, respectively. \*p < 0.05, \*\*p < 0.01, \*\*\*p < 0.001, versus WT mice; ##p < 0.01, versus vehicle-treated C57/BL6J-βENaC-Tg mice; Student's t test.

Fig. S3

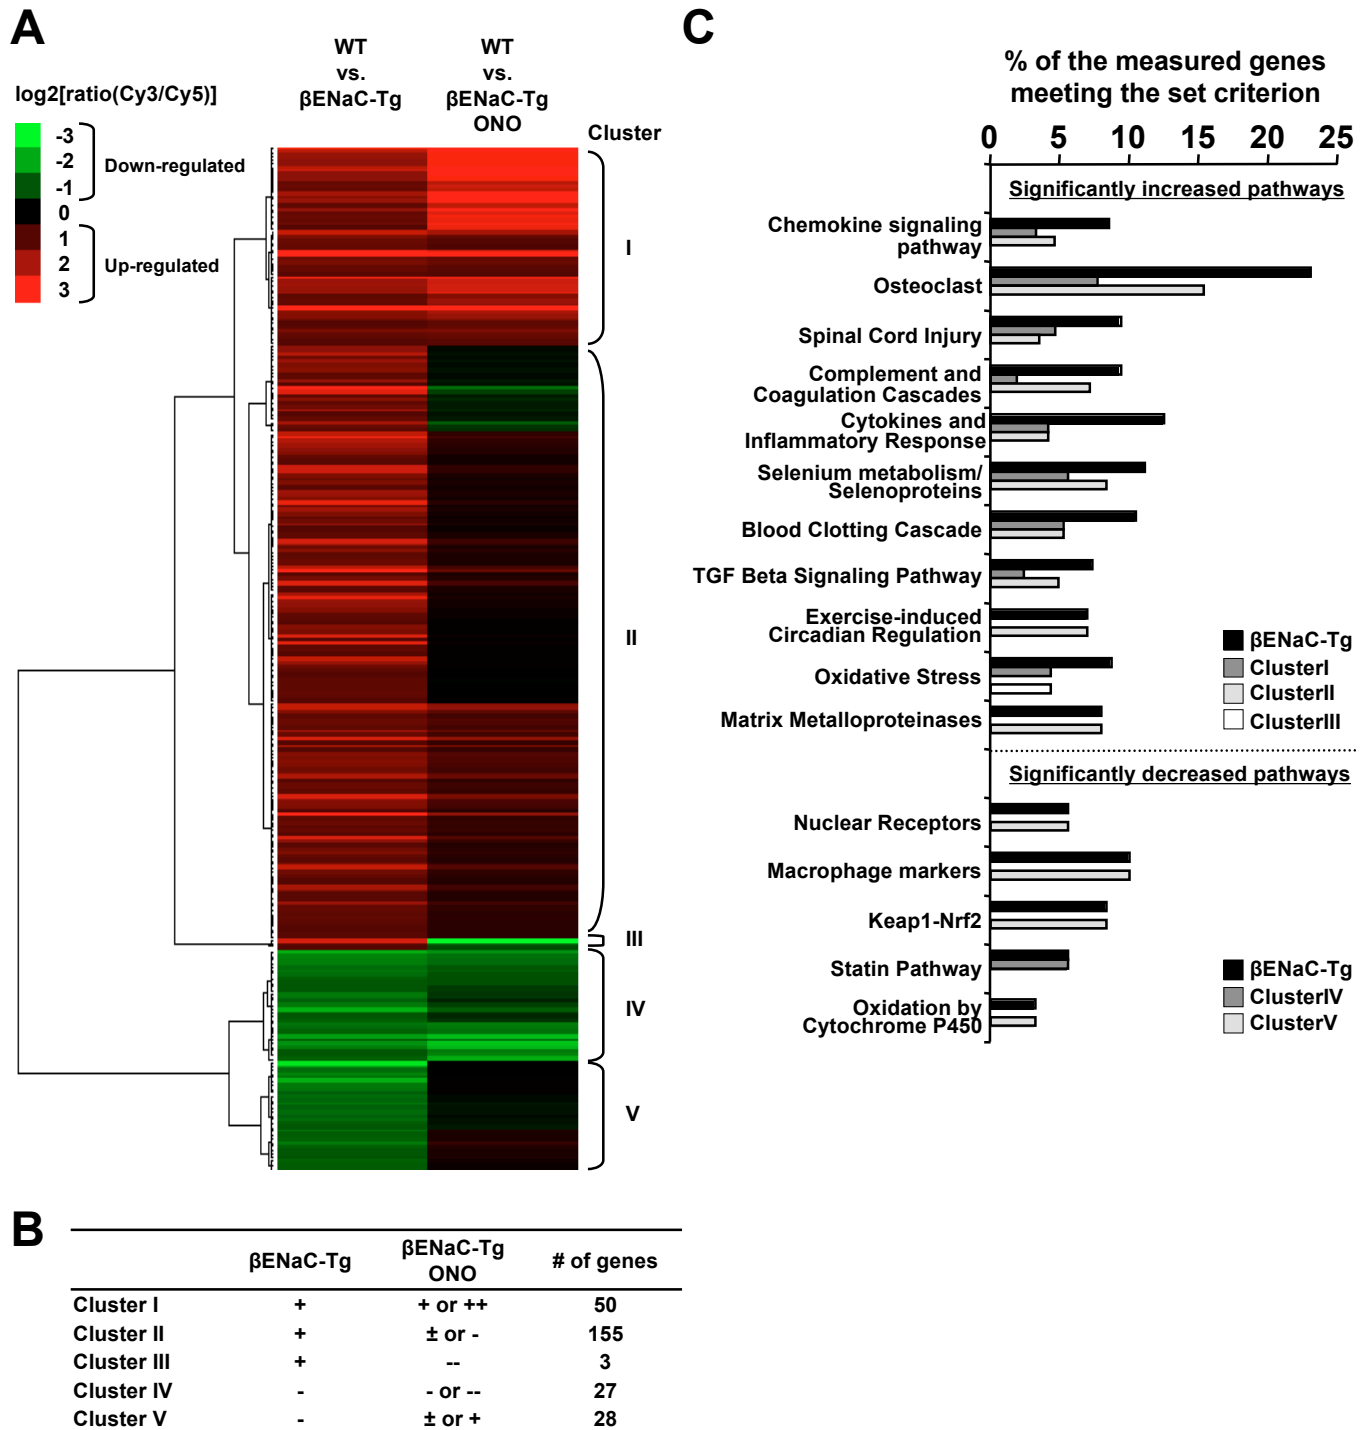

**Fig. S3. Microarray and cluster analyses of ONO3403-treated C57/BL6J- $\beta$ ENaC-Tg mice.** (A) A heatmap representing the cluster analysis of gene alteration based on the microarray in lung tissue of ONO-3403-treated and -untreated C57BL/6J- $\beta$ ENaC-Tg mice compared to WT mice. Patterns of five cluster sets were indicated in (B). +, up-regulated; ++, highly up-regulated;  $\pm$ , not altered; -, down-regulated; --, highly down-regulated: versus WT mice. (C) Comparison of pathway analysis of ONO-3403-treated and -untreated C57BL/6J- $\beta$ ENaC-Tg mice compared to WT mice.

Fig. S4

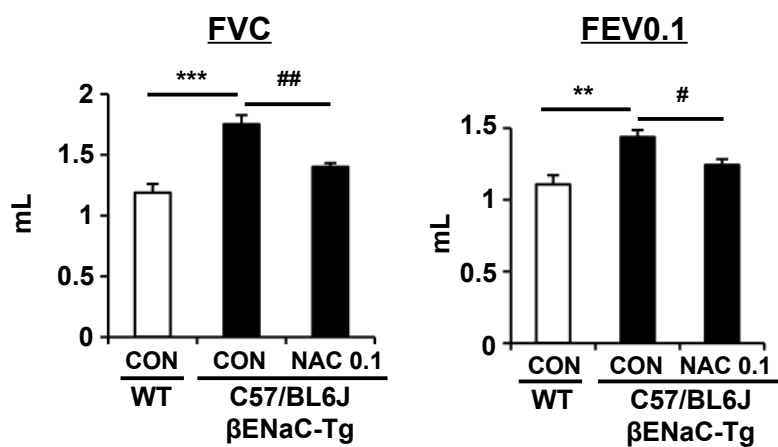

**Fig. S4. Effect of NAC on FVC and FEV0.1 in C57/BL6J-βENaC-Tg mice.** Pulmonary phenotypes (FVC and FEV0.1) were evaluated intratracheal N-acetylcysteine (NAC)-treated C57/BL6J-βENaC-Tg mice. Age-matched C57/BL6J mice (WT) were used as healthy controls. n=4-5 mice/group. \*\*p < 0.01, \*\*\*p < 0.001, versus WT mice; Student's t test. #p < 0.05, ##p < 0.01, versus vehicle-treated C57/BL6J-βENaC-Tg mice; Dunnett's test.

Fig. S5

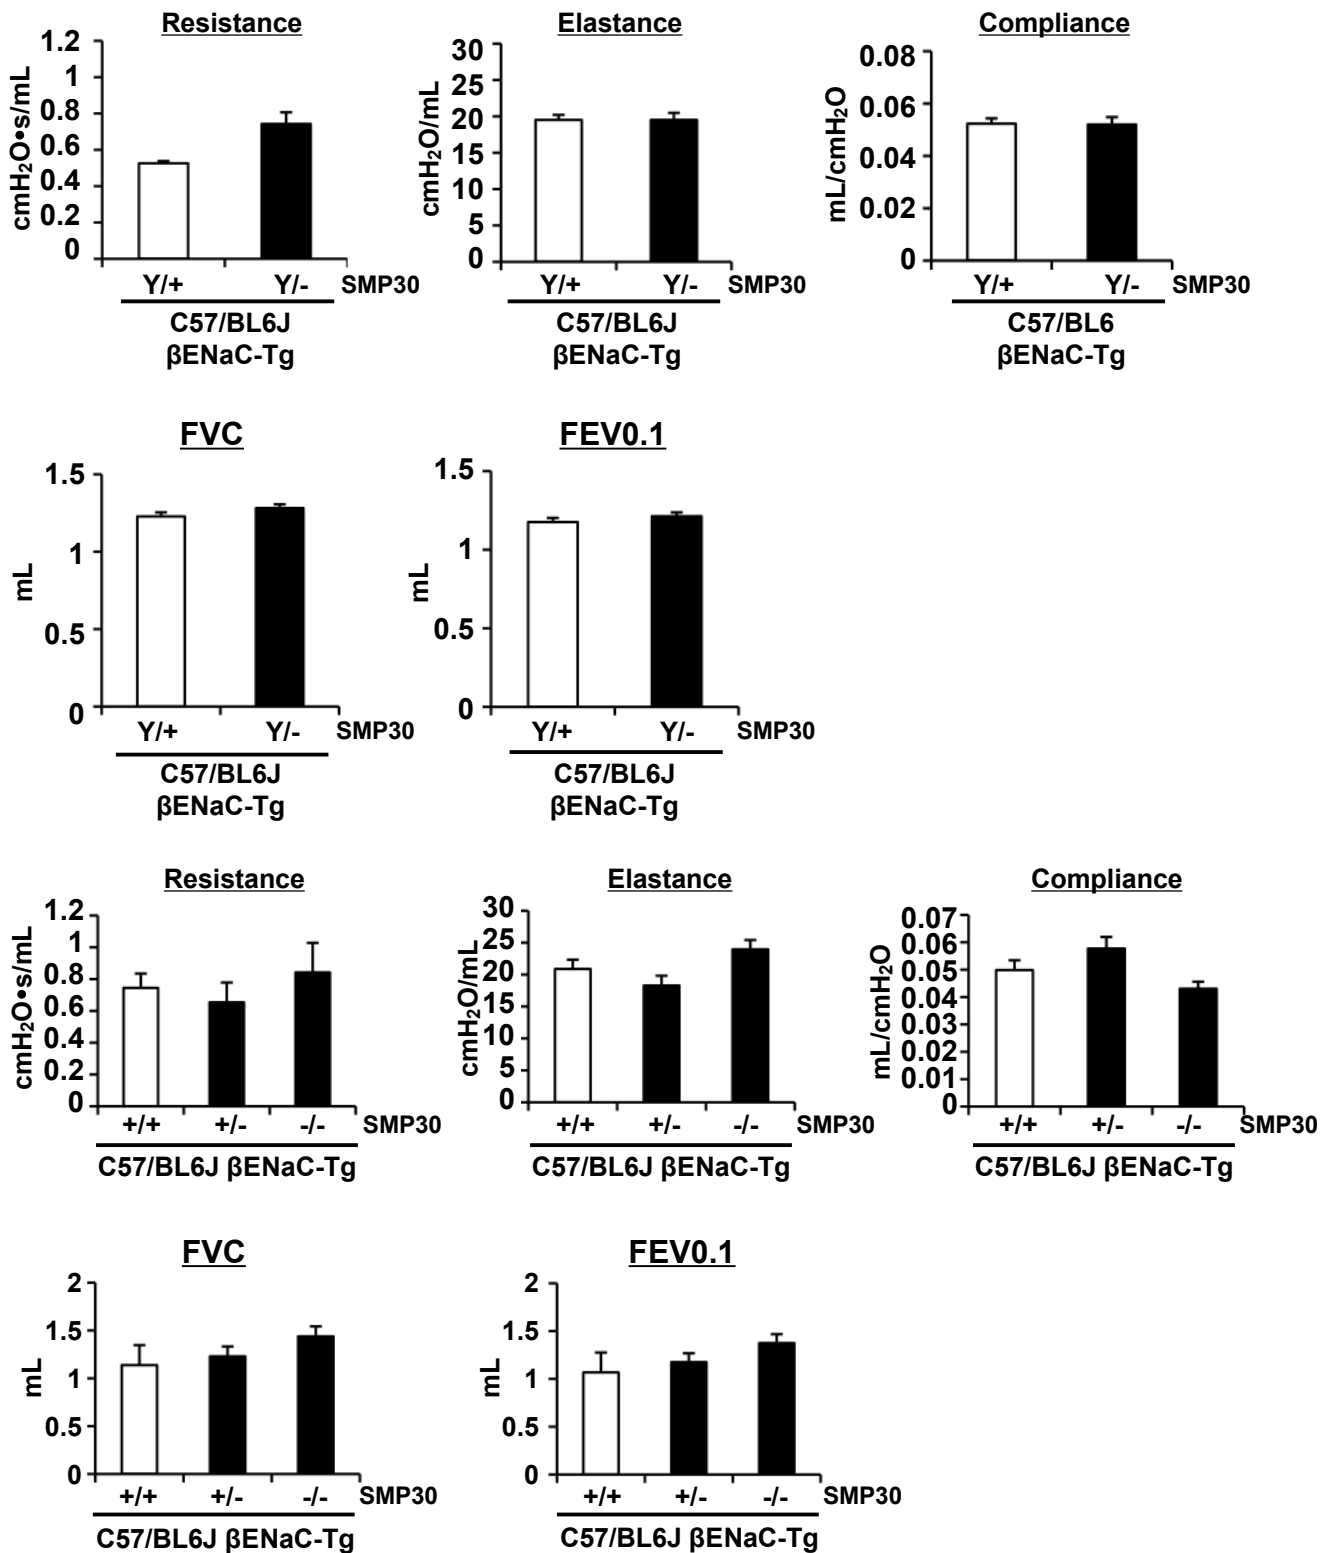

**Fig. S5. Effect of SMP30 deficiency on Pulmonary mechanics, FVC and FEV0.1 in C57/BL6J-βENaC-Tg mice.** Pulmonary phenotypes (Resistance, Compliance, Elastance, FVC and FEV0.1) were evaluated in male (Y/+ and Y/-) and female (+/+, +/- and -/-) C57/BL6J-βENaC-Tg and C57/BL6J-βENaC-Tg-SMP KO mice. n=6 mice/group.

Fig. S6

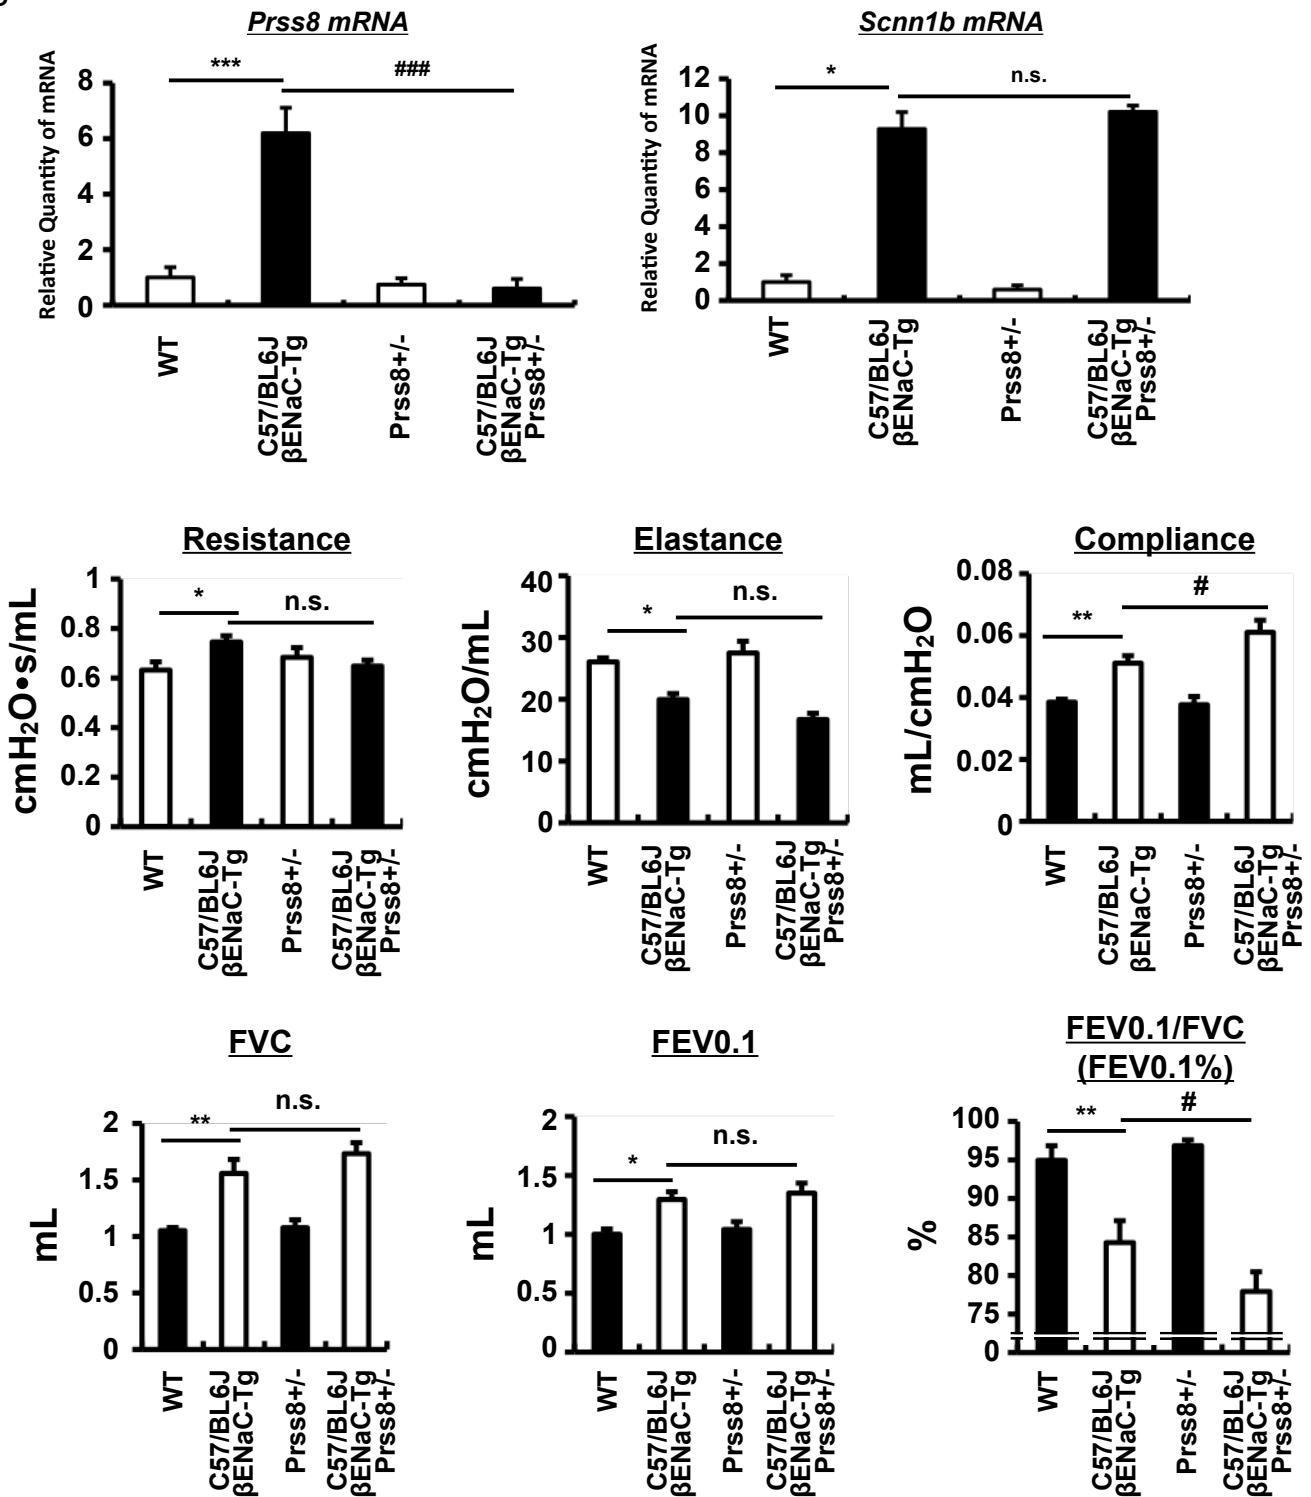

**Fig. S6. Effect of heterozygous deletion of Prss8 on genes expression, Pulmonary mechanics, FVC and FEV0.1 in C57/BL6J-βENaC-Tg mice.** Gene expression levels of Prss8 and Scnn1b (βENaC) and pulmonary phenotypes (Resistance, Compliance, Elastance, FVC, FEV0.1 and FEV0.1%) were evaluated in WT, Prss8+/-, C57/BL6J-βENaC-Tg and double mutant Prss8+/- C57/BL6J-βENaC-Tg mice. n=3 mice/group. \*p < 0.05, \*\*p < 0.01, \*\*\*p < 0.001, versus WT mice; #p < 0.05, ###p < 0.001 versus C57/BL6J-βENaC-Tg mice; Student's t test. n.s. not significant.

Table. S1. Genes Increased in the lung tissue of ENaC-Tg mice (2-fold $\leq$ , Cy3 $\geq$ 20)

(1/3)

| RefSeq_id    | Enterz_id | symbol        | description                                                   | Cy5 (WT) | Cy3 (ENaC-Tg) | Cy3/Cy5 (fold) |
|--------------|-----------|---------------|---------------------------------------------------------------|----------|---------------|----------------|
| NM_178241    | 227288    | Il8ra         | interleukin 8 receptor, alpha                                 | 8.63     | 203.36        | 23.58          |
| NM_025989    | 67133     | Gp2           | glycoprotein 2 (zymogen granule membrane)                     | 4.73     | 74.91         | 15.83          |
| NM_009141    | 100044702 | Cxcl5         | chemokine (C-X-C motif) ligand 5                              | 10.22    | 133.71        | 13.08          |
| NM_053113    | 93726     | Ear11         | eosinophil-associated, ribonuclease A family, member 11       | 5.13     | 66.09         | 12.88          |
| NM_016960    | 20297     | Ccl20         | chemokine (C-C motif) ligand 20                               | 10.75    | 127.40        | 11.85          |
| NM_011315    | 20210     | Saa3          | serum amyloid A 3                                             | 58.11    | 652.21        | 11.22          |
| XM_139051    | 214922    | Slc39a2       | solute carrier family 39 (zinc transporter), member 2         | 24.60    | 246.27        | 10.01          |
| NM_008176    | 14825     | Cxcl1         | chemokine (C-X-C motif) ligand 1                              | 19.67    | 182.34        | 9.27           |
| NM_028946    | 74446     | Slc9b1        | RIKEN cDNA 4933425K02 gene                                    | 6.20     | 49.25         | 7.95           |
| NM_010584    | 16429     | Itlna         | intelectin a                                                  | 4.98     | 38.90         | 7.82           |
| NM_053110    | 93695     | Gpnmb         | glycoprotein (transmembrane) nmb                              | 175.11   | 1214.87       | 6.94           |
| NM_206535    | 271375    | Cd200r2       | Cd200 receptor 2                                              | 8.32     | 57.10         | 6.86           |
| NM_133245    | 51327     | Ahsp          | alpha hemoglobin stabilizing protein (Ahsp)                   | 78.35    | 515.11        | 6.57           |
| NM_010766    | 17167     | Marco         | macrophage receptor with collagenous structure                | 164.80   | 1060.77       | 6.44           |
| -            | 668389    | IGHV2-4       | Immunoglobulin heavy chain V gene segment                     | 12.01    | 74.99         | 6.25           |
| NM_145126    | 104183    | Chi3l4        | chitinase 3-like 4                                            | 405.04   | 2506.70       | 6.19           |
| NM_007802    | 13038     | Ctsk          | cathepsin K                                                   | 171.24   | 1055.24       | 6.16           |
| -            | 667859    | IGKV8-18      | Immunoglobulin Kappa light chain V gene segment               | 4.41     | 26.89         | 6.10           |
| NM_020498    | 57248     | Ly6i          | lymphocyte antigen 6 complex, locus I                         | 45.00    | 265.66        | 5.90           |
| NM_017474    | 23844     | Clca3         | chloride channel calcium activated 3                          | 6.90     | 40.25         | 5.83           |
| NM_145594    | 234199    | Fgl1          | fibrinogen-like protein 1                                     | 4.18     | 23.88         | 5.71           |
| XM_138376    | 238448    | Ighv1-62-2    | Immunoglobulin heavy chain V gene segment                     | 30.20    | 165.25        | 5.47           |
| NM_008046    | 14313     | Fst           | follistatin                                                   | 13.49    | 73.68         | 5.46           |
| NM_183249    | 66107     | 1100001G20Rik | RIKEN cDNA 1100001G20 gene                                    | 167.03   | 897.54        | 5.37           |
| -            | 780799    | IGHV7-1       | Immunoglobulin heavy chain V gene segment                     | 21.46    | 110.41        | 5.15           |
| NM_008694    | 18054     | Ngp           | neutrophilic granule protein                                  | 8.77     | 45.09         | 5.14           |
| XM_357633    | 620017    | IGKV5-39      | Immunoglobulin Kappa light chain V gene segment               | 48.60    | 247.10        | 5.08           |
| NM_133862    | 99571     | Fgg           | fibrinogen, gamma polypeptide                                 | 16.64    | 83.81         | 5.04           |
| NM_010479    | 193740    | Hspa1a        | heat shock protein 1A                                         | 198.37   | 978.64        | 4.93           |
| NM_009892    | 12655     | Chi3l3        | chitinase 3-like 3                                            | 7566.47  | 36918.29      | 4.88           |
| NM_009140    | 20311     | Cxcl5         | chemokine (C-X-C motif) ligand 5                              | 11.88    | 57.36         | 4.83           |
| NM_011867    | 23985     | Slc26a4       | solute carrier family 26, member 4                            | 12.92    | 60.72         | 4.70           |
| -            | 619833    | IGHV1-69      | Immunoglobulin heavy chain V gene segment                     | 31.21    | 145.42        | 4.66           |
| NM_001286493 | 546038    | Spag11b       | predicted gene, EG546038                                      | 33.02    | 153.78        | 4.66           |
| XM_138377    | 382695    | IGHV1-56      | Immunoglobulin heavy chain V gene segment                     | 131.01   | 606.10        | 4.63           |
| NM_009921    | 12796     | Camp          | cathelicidin antimicrobial peptide                            | 10.06    | 45.37         | 4.51           |
| -            | 384411    | IGKV12-89     | Immunoglobulin Kappa light chain V gene segment               | 6.95     | 30.26         | 4.35           |
| NM_007739    | 12837     | Col8a1        | procollagen, type VIII, alpha 1                               | 13.14    | 54.98         | 4.18           |
| XM_357683    | 384514    | IGKV4-57-1    | Immunoglobulin Kappa light chain V gene segment               | 148.30   | 618.50        | 4.17           |
| NM_145603    | 234671    | Ces2          | carboxylesterase 2                                            | 5.04     | 20.81         | 4.13           |
| NM_011337    | 20302     | Ccl3          | chemokine (C-C motif) ligand 3                                | 51.54    | 209.59        | 4.07           |
| NM_207281    | 403183    | 4832428D23Rik | RIKEN cDNA 4832428D23 gene                                    | 11.22    | 45.44         | 4.05           |
| NM_007739    | 12837     | COL8A1        | collagen, type VIII, alpha 1                                  | 58.40    | 232.72        | 3.98           |
| M34982       | -         | IGHV1S52      | Immunoglobulin heavy chain V gene segment                     | 126.99   | 503.93        | 3.97           |
| XM_111360    | 28453     | IGHV3-6       | Immunoglobulin heavy chain V gene segment                     | 64.83    | 254.06        | 3.92           |
| NM_174998    | 170638    | Hpcal4        | hippocalcin-like 4                                            | 7.73     | 30.23         | 3.91           |
| NM_031254    | 83433     | Trem2         | triggering receptor expressed on myeloid cells 2              | 71.80    | 277.93        | 3.87           |
| XM_129391    | 71884     | Chit1         | chitinase 1 (chitotriosidase)                                 | 20.45    | 78.33         | 3.83           |
| NM_009890    | 12642     | Ch25h         | cholesterol 25-hydroxylase                                    | 86.57    | 327.90        | 3.79           |
| NM_145227    | 246728    | Oas2          | 2'-5' oligoadenylate synthetase 2                             | 17.47    | 65.10         | 3.73           |
| XM_203589    | 640979    | IGHV1S5       | Immunoglobulin heavy chain V gene segment                     | 71.73    | 266.36        | 3.71           |
| NM_008920    | 19074     | Prg2          | proteoglycan 2, bone marrow                                   | 8.21     | 30.41         | 3.70           |
| -            | -         | IGHV1S7       | Immunoglobulin heavy chain V gene segment                     | 101.05   | 372.95        | 3.69           |
| NM_207244    | 271375    | Cd200r2       | Cd200 receptor 2                                              | 65.26    | 236.67        | 3.63           |
| NM_133362    | 170942    | Erd1          | erythroid differentiation regulator 1                         | 847.02   | 3062.68       | 3.62           |
| NM_009139    | 20305     | Ccl6          | chemokine (C-C motif) ligand 6                                | 882.07   | 3166.88       | 3.59           |
| XM_283962    | 74152     | Stra6l        | RIKEN cDNA 1300002K09 gene                                    | 7.38     | 26.37         | 3.57           |
| NM_007739    | 12837     | Col8a1        | procollagen, type VIII, alpha 1                               | 39.83    | 140.77        | 3.53           |
| XM_355832    | -         | IGKV4-58      | Immunoglobulin Kappa light chain V gene segment               | 53.35    | 187.89        | 3.52           |
| NM_134160    | 171166    | Mcoln3        | mucoilin 3                                                    | 38.25    | 134.68        | 3.52           |
| -            | -         | IGHV1-55      | Immunoglobulin Kappa light chain V gene segment               | 152.19   | 529.14        | 3.48           |
| XM_356629    | -         | IGHV1-56      | Immunoglobulin Kappa light chain V gene segment               | 47.55    | 163.18        | 3.43           |
| NM_013532    | 14728     | Lilrb4        | leukocyte immunoglobulin-like receptor, subfamily B, member 4 | 177.68   | 590.79        | 3.32           |
| XM_127186    | -         | IGHV1-11      | Immunoglobulin heavy chain V gene segment                     | 164.27   | 545.79        | 3.32           |
| NM_177836    | 23792     | Adam23        | a disintegrin and metallopeptidase domain 23                  | 7.46     | 24.63         | 3.30           |
| XM_138324    | -         | IGHV6S4       | Immunoglobulin heavy chain V gene segment                     | 8.20     | 27.02         | 3.30           |
| -            | -         | -             | unknown                                                       | 324.36   | 1056.43       | 3.26           |
| -            | -         | -             | unknown                                                       | 277.82   | 901.17        | 3.24           |
| NM_027552    | 70789     | Kynu          | kynureninase (L-kynurenine hydrolase)                         | 21.85    | 70.26         | 3.22           |
| NM_008605    | 17381     | Mmp12         | matrix metallopeptidase 12                                    | 32.21    | 102.88        | 3.19           |
| NM_013532    | 14728     | Lilrb4        | leukocyte immunoglobulin-like receptor, subfamily B, member 4 | 253.48   | 807.33        | 3.18           |
| NM_198164    | 78334     | Cdc2l6        | cell division cycle 2-like 6 (CDK8-like)                      | 172.64   | 547.61        | 3.17           |
| XM_487248    | -         | IGHV1S125     | Immunoglobulin heavy chain V gene segment                     | 193.91   | 614.75        | 3.17           |
| NM_172814    | 239393    | Lrp12         | low density lipoprotein-related protein 12                    | 87.12    | 275.37        | 3.16           |
| NM_021364    | 23845     | Clec5a        | C-type lectin domain family 5, member a                       | 15.90    | 50.06         | 3.15           |
| NM_145222    | 227327    | B3gnt7        | UDP-GlcNAc:betaGal beta-1,3-N-acetylglucosaminyltransferase 7 | 60.91    | 187.42        | 3.08           |
| NM_013655    | 20315     | Cxcl12        | chemokine (C-X-C motif) ligand 12                             | 1194.92  | 3675.63       | 3.08           |
| XM_487240    | 634100    | IGHV1-31      | Immunoglobulin heavy chain V gene segment                     | 12.85    | 39.19         | 3.05           |



Table. S1. Genes Increased in the lung tissue of ENaC-Tg mice (2-fold $\leq$ , Cy3 $\geq$ 20)

(2/3)

| RefSeq_id     | Enterz_id | symbol        | description                                                                                     | Cy5 (WT) | Cy3 (ENaC-Tg) | Cy3/Cy5 (fold) |
|---------------|-----------|---------------|-------------------------------------------------------------------------------------------------|----------|---------------|----------------|
| NM_009969     | 12981     | Csf2          | colony stimulating factor 2 (granulocyte-macrophage)                                            | 23.02    | 69.99         | 3.04           |
| NM_020509     | 57262     | Retnla        | resistin like alpha                                                                             | 841.60   | 2554.65       | 3.04           |
| XM_138364     | -         | IGHV1S6       | Immunoglobulin heavy chain V gene segment                                                       | 89.15    | 269.52        | 3.02           |
| NM_007388     | 11433     | Acp5          | acid phosphatase 5, tartrate resistant                                                          | 174.80   | 527.97        | 3.02           |
| NM_011819     | 23886     | Gdf15         | growth differentiation factor 15                                                                | 41.00    | 123.06        | 3.00           |
| NM_029931     | 70122     | Mlt3          | myeloid/lymphoid or mixed lineage-leukemia translocation to 3 homolog (Drosophila)              | 10.77    | 32.17         | 2.99           |
| NM_008611     | 17394     | Mmp8          | matrix metalloproteinase 8                                                                      | 108.36   | 322.88        | 2.98           |
| NM_001168304  | 78334     | Cdk19         | cyclin-dependent kinase 19                                                                      | 15.90    | 47.15         | 2.97           |
| NM_021325     | 57781     | Cd200r1       | CD200 receptor 1                                                                                | 32.47    | 95.75         | 2.95           |
| NM_008491     | 16819     | Lcn2          | lipocalin 2                                                                                     | 1671.51  | 4922.58       | 2.94           |
| 010512;NM_184 | 16000     | Igf1          | insulin-like growth factor 1                                                                    | 90.28    | 263.33        | 2.92           |
| NM_013559     | -         | Hsp110        | heat shock protein 110                                                                          | 108.81   | 314.37        | 2.89           |
| -             | -         | -             | unknown                                                                                         | 7.22     | 20.77         | 2.88           |
| NM_018746     | 16427     | Itih4         | inter alpha-trypsin inhibitor, heavy chain 4                                                    | 446.02   | 1280.97       | 2.87           |
| XM_138378     | 636126    | IGHV1S53      | Immunoglobulin heavy chain V gene segment                                                       | 69.27    | 198.40        | 2.86           |
| NM_025844     | 66917     | Chordc1       | cysteine and histidine-rich domain (CHORD)-containing, zinc-binding protein 1                   | 103.19   | 295.25        | 2.86           |
| NM_021334     | 16411     | Itgax         | integrin alpha X                                                                                | 234.95   | 664.11        | 2.83           |
| NM_013559     | 15505     | Hsph1         | predicted gene, ENSMUSG00000053750                                                              | 30.14    | 84.55         | 2.80           |
| NM_010934     | 18166     | Npy1r         | neuropeptide Y receptor Y1                                                                      | 26.03    | 72.78         | 2.80           |
| NM_145515     | 226778    | Mark1         | MAP/microtubule affinity regulating kinase 1                                                    | 51.07    | 142.36        | 2.79           |
| NM_133775     | 77125     | Il33          | interleukin 33                                                                                  | 732.03   | 2035.04       | 2.78           |
| NM_011331     | 20293     | Ccl12         | chemokine (C-C motif) ligand 12                                                                 | 41.75    | 115.79        | 2.77           |
| NM_019911     | 56720     | Tdo2          | tryptophan 2,3-dioxygenase                                                                      | 20.83    | 57.65         | 2.77           |
| NM_010634     | 16592     | Fabp5         | fatty acid binding protein 5, epidermal                                                         | 110.57   | 300.43        | 2.72           |
| -             | -         | IGKV4-54      | Immunoglobulin Kappa light chain V gene segment                                                 | 48.96    | 132.32        | 2.70           |
| -             | -         | IGKV4-72      | Immunoglobulin Kappa light chain V gene segment                                                 | 197.99   | 533.35        | 2.69           |
| XM_135414     | -         | IGKV4-57      | Immunoglobulin Kappa light chain V gene segment                                                 | 62.65    | 167.72        | 2.68           |
| XM_888439     | 623924    | Gm6462        | predicted gene 6462                                                                             | 238.41   | 632.52        | 2.65           |
| NM_027836     | 109225    | Ms4a7         | membrane-spanning 4-domains, subfamily A, member 7                                              | 101.80   | 264.19        | 2.60           |
| NM_009853     | 12514     | Cd68          | CD68 antigen                                                                                    | 429.97   | 1100.12       | 2.56           |
| -             | -         | IGKV4-91      | Immunoglobulin Kappa light chain V gene segment                                                 | 71.44    | 180.81        | 2.53           |
| XM_131683     | 76574     | Mfsd2         | major facilitator superfamily domain containing 2                                               | 66.74    | 168.30        | 2.52           |
| NM_145467     | 223272    | Itgbl1        | integrin, beta-like 1                                                                           | 65.44    | 164.62        | 2.52           |
| NM_008768     | 18405     | Orm1          | orosomucoid 1                                                                                   | 12.69    | 31.86         | 2.51           |
| NM_023655     | 72169     | Trim29        | tripartite motif protein 29                                                                     | 9.05     | 22.57         | 2.50           |
| NM_010104     | 13614     | Edn1          | endothelin 1                                                                                    | 572.74   | 1427.75       | 2.49           |
| NM_175406     | 242341    | Atp6v0d2      | ATPase, H <sup>+</sup> transporting, lysosomal V0 subunit D2                                    | 435.61   | 1083.13       | 2.49           |
| NM_008590     | 17294     | Mest          | mesoderm specific transcript                                                                    | 21.18    | 52.54         | 2.48           |
| XM_111360     | -         | IGHV3-5       | Immunoglobulin heavy chain V gene segment                                                       | 15.68    | 38.85         | 2.48           |
| NM_031198     | 21426     | Tcfec         | transcription factor EC                                                                         | 35.02    | 86.51         | 2.47           |
| XM_111361     | 100045791 | IGHV9-3       | Immunoglobulin heavy chain V gene segment                                                       | 36.09    | 89.02         | 2.47           |
| NM_016737     | 20867     | Stip1         | stress-induced phosphoprotein 1                                                                 | 304.89   | 749.13        | 2.46           |
| XM_356617     | -         | IGHV1S99      | Immunoglobulin heavy chain V gene segment                                                       | 149.99   | 367.62        | 2.45           |
| NM_011031     | 18452     | P4ha2         | procollagen-proline, 2-oxoglutarate 4-dioxygenase (proline 4-hydroxylase), alpha II polypeptide | 109.06   | 265.16        | 2.43           |
| NM_010819     | 17474     | Clec4d        | C-type lectin domain family 4, member d                                                         | 183.45   | 444.30        | 2.42           |
| NM_007969     | 14038     | Wfdc18        | WAP four-disulfide core domain 18                                                               | 12.08    | 29.11         | 2.41           |
| NM_144943     | 246278    | Cd207         | CD 207 antigen                                                                                  | 14.00    | 33.60         | 2.40           |
| -             | -         | IGKV4-71      | Immunoglobulin Kappa light chain V gene segment                                                 | 150.94   | 361.66        | 2.40           |
| NM_016812     | 53325     | Banp          | Btg3 associated nuclear protein                                                                 | 318.07   | 759.85        | 2.39           |
| NM_001004174  | 433470    | AA467197      | expressed sequence AA467197                                                                     | 46.79    | 111.67        | 2.39           |
| XM_134720     | 235130    | Adams15       | a disintegrin-like and metalloproteinase (repolysin type) with thrombospondin type 1 motif, 15  | 209.73   | 498.76        | 2.38           |
| NM_172589     | 218454    | Lhfp12        | lipoma HMGIC fusion partner-like 2                                                              | 75.25    | 178.66        | 2.37           |
| -             | -         | IGHV1-20      | Immunoglobulin heavy chain V gene segment                                                       | 278.87   | 661.36        | 2.37           |
| NM_031999     | 83924     | Gpr137b       | G protein-coupled receptor 137B                                                                 | 196.67   | 465.96        | 2.37           |
| -             | -         | IGKV4-55      | Immunoglobulin Kappa light chain V gene segment                                                 | 141.82   | 334.75        | 2.36           |
| -             | -         | -             | unknown                                                                                         | 108.64   | 256.19        | 2.36           |
| NM_011260     | 19695     | Reg3g         | regenerating islet-derived 3 gamma                                                              | 337.37   | 792.49        | 2.35           |
| XM_129166     | 77836     | Mlana         | melan-A                                                                                         | 20.62    | 48.08         | 2.33           |
| -             | 108857    | Ankhd1        | ankyrin repeat and KH domain containing 1                                                       | 9.52     | 22.16         | 2.33           |
| NM_009303     | 20972     | Syng1         | synaptogyrin 1                                                                                  | 132.86   | 309.26        | 2.33           |
| NM_009983     | 13033     | Ctsd          | cathepsin D                                                                                     | 5658.60  | 13154.38      | 2.32           |
| NM_010188     | 14131     | Fcgr3         | Fc receptor, IgG, low affinity III                                                              | 297.07   | 689.81        | 2.32           |
| NM_144559     | 246256    | Fcgr3a        | Fc fragment of IgG, low affinity IIIa, receptor                                                 | 106.69   | 247.35        | 2.32           |
| NR_073011     | 381715    | 4930572O03Rik | RIKEN cDNA 4930572O03 gene                                                                      | 29.32    | 67.95         | 2.32           |
| -             | -         | IGHV1S55      | Immunoglobulin heavy chain V gene segment                                                       | 180.68   | 417.02        | 2.31           |
| NM_025759     | 360220    | Spee4d        | spermatogenesis associated glutamate (E)-rich protein 4d                                        | 23.23    | 53.59         | 2.31           |
| NM_029796     | 76905     | Lrg1          | leucine-rich alpha-2-glycoprotein 1                                                             | 876.17   | 2020.68       | 2.31           |
| NM_001039562  | 654824    | Ankrd37       | ankyrin repeat domain 37                                                                        | 26.03    | 59.71         | 2.29           |
| NM_008599     | 17329     | Cxcl9         | chemokine (C-X-C motif) ligand 9                                                                | 15.97    | 36.60         | 2.29           |
| NM_027988     | 71893     | Noxo1         | NADPH oxidase organizer 1                                                                       | 30.73    | 70.28         | 2.29           |
| NM_008522     | 17002     | Ltf           | lactotransferrin                                                                                | 65.12    | 148.89        | 2.29           |
| NM_011612     | 21942     | Tnfrsf9       | tumor necrosis factor receptor superfamily, member 9                                            | 10.54    | 23.81         | 2.26           |
| NM_008083     | 14432     | Gap43         | growth associated protein 43                                                                    | 288.38   | 649.71        | 2.25           |
| NM_010234     | 14281     | Fos           | FBJ osteosarcoma oncogene                                                                       | 387.03   | 870.57        | 2.25           |
| NM_029103     | 74840     | Armet         | arginine-rich, mutated in early stage tumors                                                    | 843.37   | 1894.12       | 2.25           |
| NM_153101     | 235712    | Mrgpra2       | MAS-related GPR, member A2                                                                      | 11.67    | 26.17         | 2.24           |
| NM_008298     | 100048597 | Dnaja1        | DnaJ (Hsp40) homolog, subfamily A, member 1                                                     | 913.76   | 2039.89       | 2.23           |
| NM_145144     | 108897    | 2810003C17Rik | RIKEN cDNA 2810003C17 gene                                                                      | 42.13    | 93.73         | 2.23           |

Table. S1. Genes Increased in the lung tissue of ENaC-Tg mice (2-fold $\leq$ , Cy3 $\geq$ 20)

(3/3)

| RefSeq_id     | Enterz_id | symbol        | description                                                                         | Cy5 (WT) | Cy3 (ENaC-Tg) | Cy3/Cy5 (fold) |
|---------------|-----------|---------------|-------------------------------------------------------------------------------------|----------|---------------|----------------|
| NM_010442     | 15368     | Hmox1         | heme oxygenase (decycling) 1                                                        | 232.62   | 514.46        | 2.21           |
| NM_011146     | 19016     | Pparg         | peroxisome proliferator activated receptor gamma                                    | 112.58   | 248.45        | 2.21           |
| NR_040420     | 625253    | Dnajb9        | DnaJ (Hsp40) homolog, subfamily B, member 9                                         | 125.21   | 276.27        | 2.21           |
| XM_142364     | 100047132 | IGKV6-20      | Immunoglobulin Kappa light chain V gene segment                                     | 44.87    | 98.96         | 2.21           |
| NM_013825     | 17076     | Ly75          | lymphocyte antigen 75                                                               | 67.24    | 148.26        | 2.20           |
| XM_138237     | 238393    | Serpina3f     | serine (or cysteine) peptidase inhibitor, clade A, member 3F                        | 35.81    | 78.95         | 2.20           |
| NM_007752     | 12870     | Cp            | ceruloplasminprovided                                                               | 1156.31  | 2548.47       | 2.20           |
| NM_183187     | 268709    | Fam107a       | cDNA sequence BC055107                                                              | 9.83     | 21.65         | 2.20           |
| NM_007469     | 11812     | Apoc1         | apolipoprotein C-I                                                                  | 320.78   | 706.74        | 2.20           |
| NM_029639     | 76509     | Plet1         | RIKEN cDNA 1600029D21 gene                                                          | 944.37   | 2071.43       | 2.19           |
| -             | -         | IGKV16-104    | Immunoglobulin Kappa light chain V gene segment                                     | 337.81   | 738.27        | 2.19           |
| NM_013489     | 12523     | Cd84          | CD84 antigen                                                                        | 112.41   | 244.90        | 2.18           |
| NM_009263     | 20750     | Spp1          | secreted phosphoprotein 1                                                           | 974.98   | 2122.61       | 2.18           |
| NM_007913     | 13653     | Egr1          | early growth response                                                               | 466.30   | 1013.73       | 2.17           |
| NM_011020     | 18415     | Hspa4l        | heat shock protein 4 like                                                           | 132.69   | 287.63        | 2.17           |
| NM_007408     | 11520     | Adfp          | adipose differentiation related protein                                             | 771.95   | 1665.59       | 2.16           |
| NM_011539     | 21391     | Tbxas1        | thromboxane A synthase 1, platelet                                                  | 127.89   | 275.39        | 2.15           |
| NM_008620     | 76074     | Gbp8          | cDNA sequence BC057170                                                              | 117.61   | 252.98        | 2.15           |
| NM_010762     | 17153     | Mal           | myelin and lymphocyte protein, T-cell differentiation protein                       | 269.36   | 579.20        | 2.15           |
| NM_145953     | 107869    | Cth           | cystathionase (cystathionine gamma-lyase)                                           | 41.12    | 88.40         | 2.15           |
| NM_010172     | 14068     | F7            | coagulation factor VII                                                              | 102.04   | 217.17        | 2.13           |
| NM_022430     | 64381     | Ms4a8a        | membrane-spanning 4-domains, subfamily A, member 8A                                 | 212.00   | 449.74        | 2.12           |
| NM_024406     | 11770     | Fabp4         | fatty acid binding protein 4, adipocyte                                             | 453.38   | 960.71        | 2.12           |
| NM_009251     | 20715     | Serpina3g     | serine (or cysteine) peptidase inhibitor, clade A, member 3G                        | 63.60    | 134.50        | 2.11           |
| NM_026931     | 69068     | 1810011O10Rik | RIKEN cDNA 1810011O10 gene                                                          | 399.48   | 844.01        | 2.11           |
| XM_485781     | -         | IGKV5-48      | Immunoglobulin Kappa light chain V gene segment                                     | 59.80    | 126.28        | 2.11           |
| NM_009779     | 12267     | C3ar1         | complement component 3a receptor 1                                                  | 27.48    | 57.97         | 2.11           |
| NM_011780     | 23792     | Adam23        | a disintegrin and metallopeptidase domain 23                                        | 14.44    | 30.44         | 2.11           |
| -             | 791346    | Gm10118       | predicted gene, ENSMUSG00000062561                                                  | 141.45   | 297.62        | 2.10           |
| NM_011414     | 20568     | Slpi          | secretory leukocyte peptidase inhibitor                                             | 460.54   | 968.53        | 2.10           |
| NM_144520     | 67815     | Sec14l2       | SEC14-like 2 (S. cerevisiae)                                                        | 209.53   | 438.33        | 2.09           |
| -             | 675749    | Gm10693       | predicted pseudogene 10693                                                          | 37.19    | 77.70         | 2.09           |
| NM_028808     | 74191     | P2ry13        | purinergic receptor P2Y, G-protein coupled 13 [Source:MarkerSymbol;Acc:MGI:1921441] | 42.63    | 88.95         | 2.09           |
| NM_008147     | 14727     | Gp49a         | leukocyte immunoglobulin-like receptor, subfamily B, member 4B                      | 118.97   | 247.46        | 2.08           |
| NM_013650     | 20201     | S100a8        | S100 calcium binding protein A8 (calgranulin A)                                     | 3273.25  | 6803.14       | 2.08           |
| NM_008198     | 14962     | Cfb           | complement factor B                                                                 | 423.72   | 879.13        | 2.07           |
| NM_145434     | 217166    | Nr1d1         | nuclear receptor subfamily 1, group D, member 1                                     | 32.52    | 67.03         | 2.06           |
| NM_172542     | 77739     | Adamts1       | ADAMTS-like 1                                                                       | 20.41    | 42.01         | 2.06           |
| NM_010588     | 16450     | Jag2          | jagged 2                                                                            | 28.74    | 59.15         | 2.06           |
| NM_008223     | 15160     | Serpind1      | serine (or cysteine) peptidase inhibitor, clade D, member 1                         | 14.48    | 29.78         | 2.06           |
| NM_013560     | 15507     | Hspb1         | heat shock protein 1                                                                | 2177.34  | 4477.24       | 2.06           |
| NM_024495     | 71934     | Car13         | carbonic anhydrase 13                                                               | 12.43    | 25.54         | 2.05           |
| 022431;NM_026 | 68774     | Ms4a6d        | membrane-spanning 4-domains, subfamily A, member 6D                                 | 196.16   | 402.93        | 2.05           |
| NM_011333     | 20296     | Ccl2          | chemokine (C-C motif) ligand 2                                                      | 49.33    | 101.25        | 2.05           |
| NM_031165     | 15481     | Hspa8         | heat shock protein 8                                                                | 3990.34  | 8174.50       | 2.05           |
| NM_011407     | 20555     | Ap2b1         | adaptor-related protein complex 2, beta 1 subunit                                   | 33.92    | 69.46         | 2.05           |
| NM_009786     | 12301     | Cacybp        | calcyclin binding protein                                                           | 1466.62  | 3002.36       | 2.05           |
| -             | -         | IGKV19-93     | Immunoglobulin Kappa light chain V gene segment                                     | 158.38   | 321.86        | 2.03           |
| NM_172679     | 229227    | 4932438A13Rik | RIKEN cDNA 4932438A13 gene                                                          | 59.01    | 119.87        | 2.03           |
| NM_007444     | 11702     | Amd1          | S-adenosylmethionine decarboxylase 1                                                | 110.90   | 224.82        | 2.03           |
| NM_016704     | 12274     | C6            | complement component 6                                                              | 189.96   | 384.12        | 2.02           |
| NM_177084     | 110895    | Slc9a4        | solute carrier family 9 (sodium/hydrogen exchanger), member 4                       | 10.17    | 20.51         | 2.02           |
| NM_024435     | 67405     | Nts           | neurotensin                                                                         | 11.97    | 24.10         | 2.01           |
| NM_007675     | 26366     | Ceacam10      | carcinoembryonic antigen-related cell adhesion molecule 10                          | 18.97    | 38.17         | 2.01           |
| NM_010554     | 16175     | Il1a          | interleukin 1 alpha                                                                 | 18.41    | 37.00         | 2.01           |
| NM_009912     | 12768     | Ccr1          | chemokine (C-C motif) receptor 1                                                    | 24.01    | 48.17         | 2.01           |
| NM_008303     | 628438    | Hspe1-rs1     | heat shock protein 1 (chaperonin 10), related sequence 1                            | 1125.36  | 2257.46       | 2.01           |
| NM_011124     | 100042493 | Ccl21b        | chemokine (C-C motif) ligand 21b                                                    | 2142.49  | 4290.31       | 2.00           |

Table. S2. Genes Decreased in the lung tissue of ENaC-Tg mice (0.5-fold $\geq$ , Cy5 $\geq$ 20)

| RefSeq_id    | Enterz_id | symbol        | description                                                                        | Cy5 (WT) | Cy3 (ENaC-Tg) | Cy3/Cy5 (fold) |
|--------------|-----------|---------------|------------------------------------------------------------------------------------|----------|---------------|----------------|
| NM_016771    | 53315     | Sult1d1       | sulfotransferase family 1D, member 1                                               | 78.64    | 11.86         | 0.15           |
| NM_198028    | 241197    | Serp1b10      | serine (or cysteine) peptidase inhibitor, clade B (ovalbumin), member 10           | 60.06    | 12.38         | 0.21           |
| NM_011681    | 22287     | Scgb1a1       | secretoglobin, family 1A, member 1 (uteroglobin)                                   | 65031.42 | 14646.36      | 0.23           |
| NM_023612    | 71690     | Esm1          | endothelial cell-specific molecule 1                                               | 314.03   | 70.78         | 0.23           |
| NM_010444    | 15370     | Nr4a1         | nuclear receptor subfamily 4, group A, member 1                                    | 1038.59  | 239.47        | 0.23           |
| NM_011126    | 18843     | Plunc         | palate, lung, and nasal epithelium carcinoma associated                            | 676.45   | 179.30        | 0.27           |
| NM_008343    | 16009     | Igf3          | insulin-like growth factor binding protein 3                                       | 327.73   | 92.32         | 0.28           |
| NM_001278161 | 15129     | Hbb-b1        | hemoglobin, beta adult major chain                                                 | 62517.42 | 18607.36      | 0.30           |
| NM_009695    | 11813     | Apoc2         | apolipoprotein C-II                                                                | 117.04   | 38.80         | 0.33           |
| NM_175012    | 225642    | Grp           | gastrin releasing peptide                                                          | 82.67    | 28.09         | 0.34           |
| NM_008218    | 110257    | Hba-a1        | hemoglobin alpha, adult chain 1                                                    | 57378.42 | 20249.72      | 0.35           |
| NM_007621    | 12409     | Cbr2          | carbonyl reductase 2                                                               | 38360.42 | 13576.28      | 0.35           |
| XM_144122    | 242805    | Ankrd65       | ankyrin repeat domain 65                                                           | 36.87    | 13.24         | 0.36           |
| -            | -         | -             | unknown                                                                            | 35.73    | 12.83         | 0.36           |
| NM_009714    | 11889     | Asgr1         | asialoglycoprotein receptor 1                                                      | 46.34    | 16.74         | 0.36           |
| NM_011784    | 23796     | Agtr1         | angiotensin receptor-like 1                                                        | 454.59   | 165.64        | 0.36           |
| -            | -         | -             | unknown                                                                            | 34.77    | 12.69         | 0.36           |
| NM_173052    | 282663    | Serp1b1b      | serine (or cysteine) peptidase inhibitor, clade B, member 1b                       | 22.68    | 8.28          | 0.37           |
| XM_110691    | 75863     | Clec4g        | C-type lectin domain family 4, member g                                            | 25.61    | 9.70          | 0.38           |
| XM_287054    | 68874     | 1190002J23Rik | RIKEN cDNA 1190002J23 gene                                                         | 32.18    | 12.25         | 0.38           |
| NM_028848    | 74717     | Spata17       | spermatogenesis associated 17                                                      | 24.18    | 9.45          | 0.39           |
| NM_008311    | 15559     | Htr2b         | 5-hydroxytryptamine (serotonin) receptor 2B                                        | 27.92    | 11.29         | 0.40           |
| XM_133956    | 213002    | Ifit6         | interferon induced transmembrane protein 6                                         | 289.45   | 118.27        | 0.41           |
| XM_129390    | 69169     | Faim3         | Fas apoptotic inhibitory molecule 3                                                | 506.40   | 208.34        | 0.41           |
| NM_019487    | 56016     | Hebp2         | heme binding protein 2                                                             | 23.47    | 9.69          | 0.41           |
| NM_054038    | 117158    | Scgb3a2       | secretoglobin, family 3A, member 2                                                 | 20687.05 | 8603.05       | 0.42           |
| NM_009234    | 20666     | Sox11         | SRY (sex determining region Y)-box 11                                              | 79.25    | 32.99         | 0.42           |
| NM_009922    | 12797     | Cnn1          | calponin 1                                                                         | 595.95   | 248.24        | 0.42           |
| NM_007817    | 13107     | Cyp2f2        | cytochrome P450, family 2, subfamily f, polypeptide 2                              | 16658.78 | 6961.71       | 0.42           |
| XM_131840    | 230899    | Nppa          | natriuretic peptide precursor type A                                               | 95.54    | 40.39         | 0.42           |
| NM_013613    | 18227     | Nr4a2         | nuclear receptor subfamily 4, group A, member 2                                    | 147.89   | 62.91         | 0.43           |
| XM_128291    | 68311     | Lypd2         | Ly6/Plaur domain containing 2                                                      | 508.95   | 224.07        | 0.44           |
| NM_001033170 | 73813     | Fam83e        | RIKEN cDNA 4930403C10 gene                                                         | 27.43    | 12.09         | 0.44           |
| NM_009749    | 12069     | Bex2          | brain expressed X-linked 2                                                         | 654.07   | 290.15        | 0.44           |
| NM_007719    | 12775     | Ccr7          | chemokine (C-C motif) receptor 7                                                   | 166.16   | 73.72         | 0.44           |
| NM_023597    | 71354     | Wdr31         | WD repeat domain 31                                                                | 57.65    | 25.73         | 0.45           |
| NM_011620    | 21957     | Tnnt3         | troponin T3, skeletal, fast                                                        | 35.65    | 15.95         | 0.45           |
| XM_134806    | 70989     | 4931429I11Rik | RIKEN cDNA 4931429I11 gene                                                         | 25.07    | 11.28         | 0.45           |
| NM_029064    | 74711     | Ttl9          | tubulin tyrosine ligase-like family, member 9                                      | 25.84    | 11.66         | 0.45           |
| NM_029627    | 76486     | Ly6k          | lymphocyte antigen 6 complex, locus K                                              | 35.48    | 16.05         | 0.45           |
| NM_017372    | 17105     | Lyzs          | lysozyme                                                                           | 56345.42 | 25566.51      | 0.45           |
| NM_021278    | 100047211 | Tmsb4x        | thymosin, beta 4, X chromosome                                                     | 49135.42 | 22309.22      | 0.45           |
| NM_001081977 | 108089    | Rnf144        | ring finger protein 144 [Source:MarkerSymbol;Acc:MGI:1344401]                      | 20.25    | 9.25          | 0.46           |
| NM_177876    | 330192    | Vps37b        | vacuolar protein sorting 37B (yeast)                                               | 22.50    | 10.35         | 0.46           |
| NM_183094    | 667387    | Xlr4b         | X-linked lymphocyte-regulated 4B                                                   | 26.62    | 12.55         | 0.47           |
| XM_485890    | 72383     | Cnfn          | cornifelin                                                                         | 142.03   | 67.15         | 0.47           |
| NM_011580    | 640441    | Thbs1         | thrombospondin 1                                                                   | 67.46    | 31.93         | 0.47           |
| XM_489730    | 71236     | Rtdr1         | rhabdoid tumor deletion region gene 1                                              | 39.11    | 18.55         | 0.47           |
| NM_007641    | 12482     | Ms4a1         | membrane-spanning 4-domains, subfamily A, member 1                                 | 561.05   | 268.25        | 0.48           |
| NM_172050    | 217306    | Cd300e        | CD300e antigen                                                                     | 61.22    | 29.40         | 0.48           |
| NM_008182    | 14858     | Gsta2         | glutathione S-transferase, alpha 2 (Yc2)                                           | 81.64    | 39.36         | 0.48           |
| NM_153391    | 213081    | Wdr19         | WD repeat domain 19                                                                | 51.80    | 25.13         | 0.49           |
| NM_138949    | 192651    | Zfp286        | zinc finger protein 286 [Source:MarkerSymbol;Acc:MGI:2384758]                      | 27.74    | 13.60         | 0.49           |
| NM_009189    | 20471     | Six1          | sine oculis-related homeobox 1 homolog (Drosophila)                                | 37.64    | 18.53         | 0.49           |
| NM_138652    | 192113    | Atp12a        | ATPase, H <sup>+</sup> /K <sup>+</sup> transporting, nongastric, alpha polypeptide | 21.97    | 10.83         | 0.49           |
| NM_007549    | 12143     | Blk           | B lymphoid kinase                                                                  | 46.11    | 22.82         | 0.49           |
| -            | -         | -             | unknown                                                                            | 25.90    | 12.84         | 0.50           |
| NM_007812    | -         | Cyp2a5        | cytochrome P450, family 2, subfamily a, polypeptide 5                              | 116.43   | 57.76         | 0.50           |
